# Supplementary material for: Anatomical Network Comparison of Human Upper and Lower, Newborn and Adult, and Normal and Abnormal Limbs, with Notes on Development, Pathology and Limb Serial Homology vs. Homoplasy
Source: PLoS One. 2015 Oct 9;10(10):e0140030. doi: 10.1371/journal.pone.0140030 (PMC4599883; doi:10.1371/journal.pone.0140030)
Supplement: S3 Results — (XLS) [file pone.0140030.s033.xls]

## Sheet: % of Similarity
	Ad/newb upper skeletal	Ad/newb upper muscular	Ad/newb upper musculoskeletal	Adult lower skeletal	Adult lower muscular	Adult lower musculoskeletal	Newborn lower skeletal	Newborn lower muscular	Newborn lower musculoskeletal	T18 upper left skeletal	T18 upper left muscular	T18 upper left musculoskeletal	T18 upper right skeletal	T18 upper right muscular	T18 upper right musculoskeletal	T18 lower left skeletal	T18 lower left muscular	T18 lower left musculoskeletal	T18 lower right skeletal	T18 lower right muscular	T18 lower right musculoskeletal
Adult/newborn upper skeletal	100.00		25.41	92.86		16.48	92.86		16.48	100.00		21.17	100.00		36.24	92.86		16.48	92.86		26.13
Adult/newborn upper muscular
Adult/neborn upper musculoskeletal	25.41		100.00	16.88	45.00	27.01	16.88	45.00	27.01	25.41	26.52	71.09	25.41	29.04	68.46	16.88	45.00	27.02	16.88	45.00	17.40
Adult lower skeletal	92.86		16.88	100.00		26.07	88.33		24.54	92.86		17.14	92.86		23.51	88.33		21.43	88.33		26.73
Adult lower muscular			45.00		100.00	7.90		100.00	7.90		53.33	31.11		53.33	22.78		90.00	10.60		90.00	23.07
Adult lower musculoskeletal	16.48		27.01	26.07	7.90	100.00	23.32	7.90	85.78	16.48	0.00	32.40	16.48	0.00	24.99	23.32	16.70	89.24	23.32	16.71	82.87
Newborn lower skeletal	92.86		16.88	88.33		23.32	100.00		28.45	92.86		17.14	92.86		23.51	100.00		27.45	100.00		32.69
Newborn lower muscular			45.00		100.00	7.90		100.00	7.90		53.33	31.11		53.33	22.78		90.00	10.60		90.00	23.07
Newborn lower musculoskeletal	16.48		27.01	24.54	7.90	85.78	28.45	7.90	100.00	16.48	0.00	32.40	16.48	0.00	24.99	28.45	16.51	79.29	28.45	16.52	73.99
T18 upper left skeletal	100.00		25.41	92.86		16.48	92.86		16.48	100.00		21.17	100.00		36.24	92.86		16.48	92.86		26.13
T18 upper left muscular			26.52		53.33	0.00		53.33	0.00		100.00	53.36		78.75	28.08		53.33	12.35		53.33	12.35
T18 upper left musculoskeletal	21.17		71.09	17.14	31.11	32.40	17.14	31.11	32.40	21.17	53.36	100.00	21.17	50.13	57.87	17.14	31.11	32.77	17.14	31.11	22.26
T18 upper right skeletal	100.00		25.41	92.86		16.48	92.86		16.48	100.00		21.17	100.00		36.24	92.86		16.48	92.86		26.13
T18 upper right muscular			29.04		53.33	0.00		53.33	0.00		78.75	50.13		100.00	41.17		53.33	12.35		53.33	12.35
T18 upper right musculoskeletal	36.24		68.46	23.51	22.78	24.99	23.51	22.78	24.99	36.24	28.08	57.87	36.24	41.17	100.00	23.51	22.78	24.28	23.51	22.78	22.36
T18 lower left skeletal	92.86		16.88	88.33		23.32	100.00		28.45	92.86		17.14	92.86		23.51	100.00		27.45	100.00		32.69
T18 lower left muscular			45.00		90.00	16.70		90.00	16.51		53.33	31.11		53.33	22.78		100.00	18.69		100.00	28.67
T18 lower left musculoskeletal	16.48		27.02	21.43	10.60	89.24	27.45	10.60	79.29	16.48	12.35	32.77	16.48	12.35	24.28	27.45	18.69	100.00	27.45	18.70	83.15
T18 lower right skeletal	92.86		16.88	88.33		23.32	100.00		28.45	92.86		17.14	92.86		23.51	100.00		27.45	100.00		32.69
T18 lower right muscular			45.00		90.00	16.71		90.00	16.52		53.33	31.11		53.33	22.78		100.00	18.70		100.00	28.67
T18 lower right musculoskeletal	26.13		17.40	26.73	23.07	82.87	32.69	23.07	73.99	26.13	12.35	22.26	26.13	12.35	22.36	32.69	28.67	83.15	32.69	28.67	100.00
